# Supplementary material for: Construction and Application of a Pollen Emissions Model based on Phenology and Random Forests
Source: Copernicus journal article supplement (doi:10.5194/egusphere-2024-2000), 2024-09-19
Supplement: Supplementary file 1 [file egusphere-2024-2000-supplement.pdf]

Construction and Application of a Pollen Emissions Model based on  
Phenology and Random Forests

**Supplement Information**

Jiangtao Li<sup>a,b</sup>, Xingqin An<sup>a,\*</sup>, Zhaobin Sun<sup>a</sup>, Caihua Ye<sup>c</sup>, Qing Hou<sup>a</sup>, Yuxin Zhao<sup>a</sup>, Zhe Liu<sup>a</sup>

<sup>a</sup> State Key Laboratory of Severe Weather, Chinese Academy of Meteorological Sciences, Beijing, 100081, China

<sup>b</sup> Department of Atmospheric and Oceanic Sciences & Institute of Atmospheric Sciences, Fudan University, Shanghai 200438, China

<sup>c</sup> Meteorological Service Center of Beijing Meteorological Bureau, Beijing, 100089, China

## Supplementary Figures:

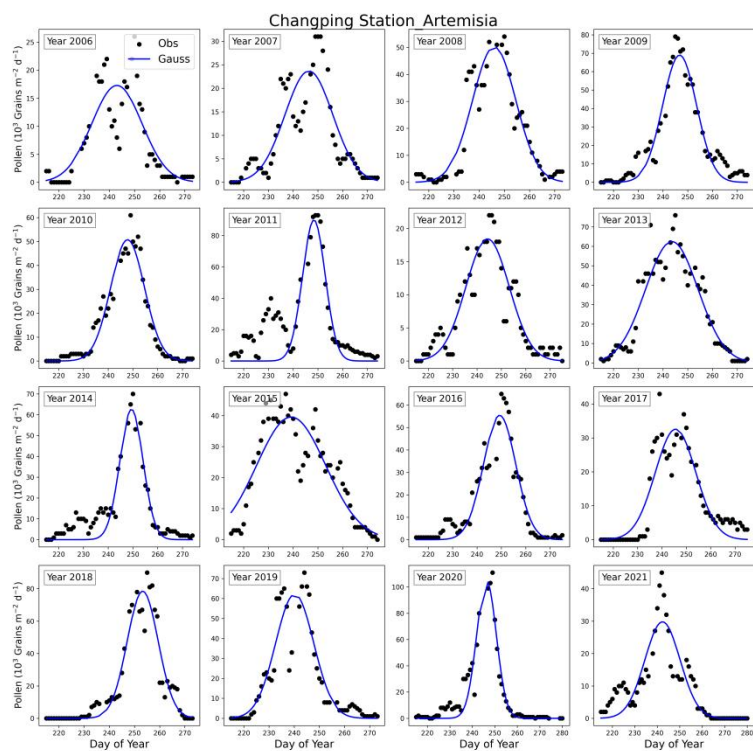

Figure. S1. Artemisia and its Gaussian fitting distribution at the CP station from 2006 to 2021.

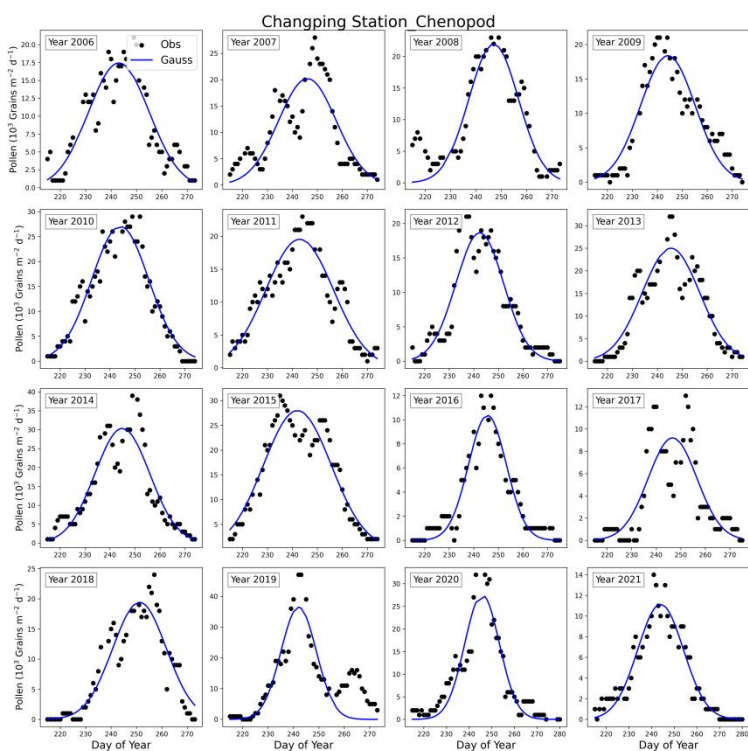

Figure. S2. Chenopod and its Gaussian fitting distribution at the CP station from 2006 to 2021.

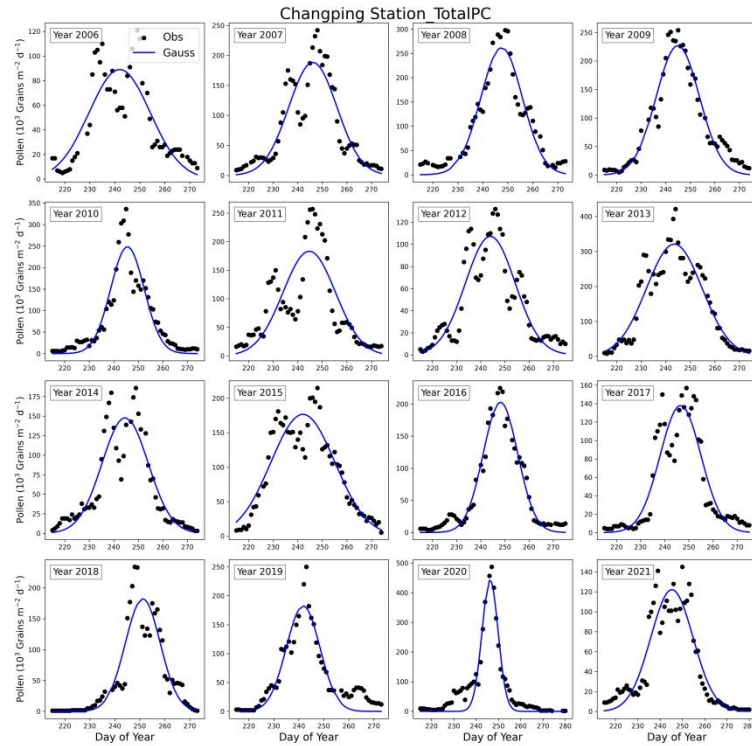

Figure. S3. TotalPC and its Gaussian fitting distribution at the CP station from 2006 to 2021.

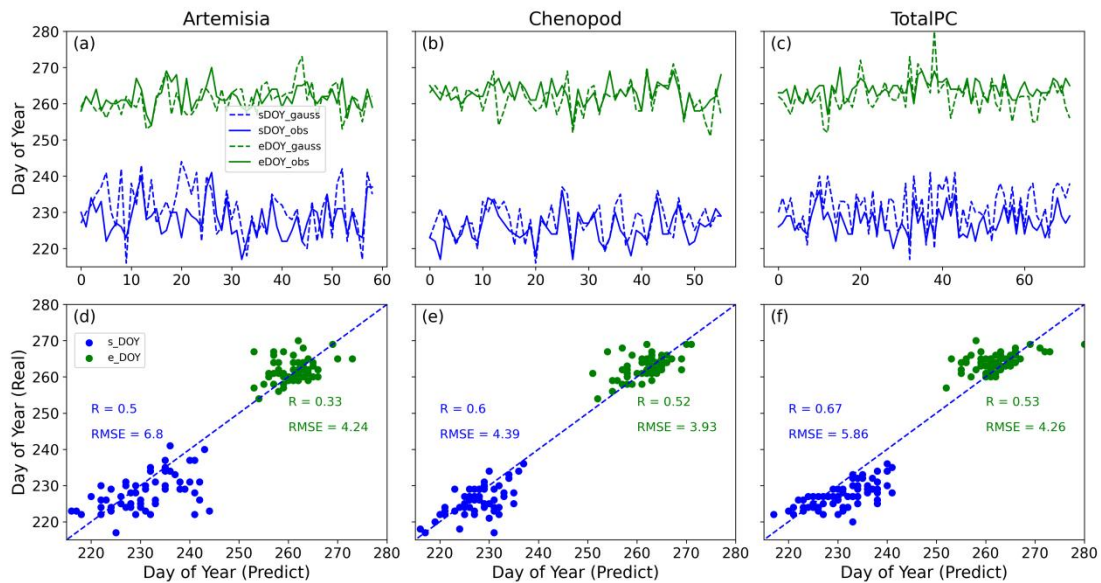

Figure. S4. Comparison of pollen sDOY and eDOY in Gauss fitting: simulation vs. observation.

Line plots of three different pollen sDOY and eDOY (a-c) and scatter plot comparison of the same (d-f). Specific comparisons for Artemisia (a, d), Chenopod (b, e), and TotalPC (c, f).
